# Supplementary material
Source: PubMed Central journal article supplement (PMC2867510)
Supplement: 00279.2009_1.pdf [file 00279.2009_1.pdf]

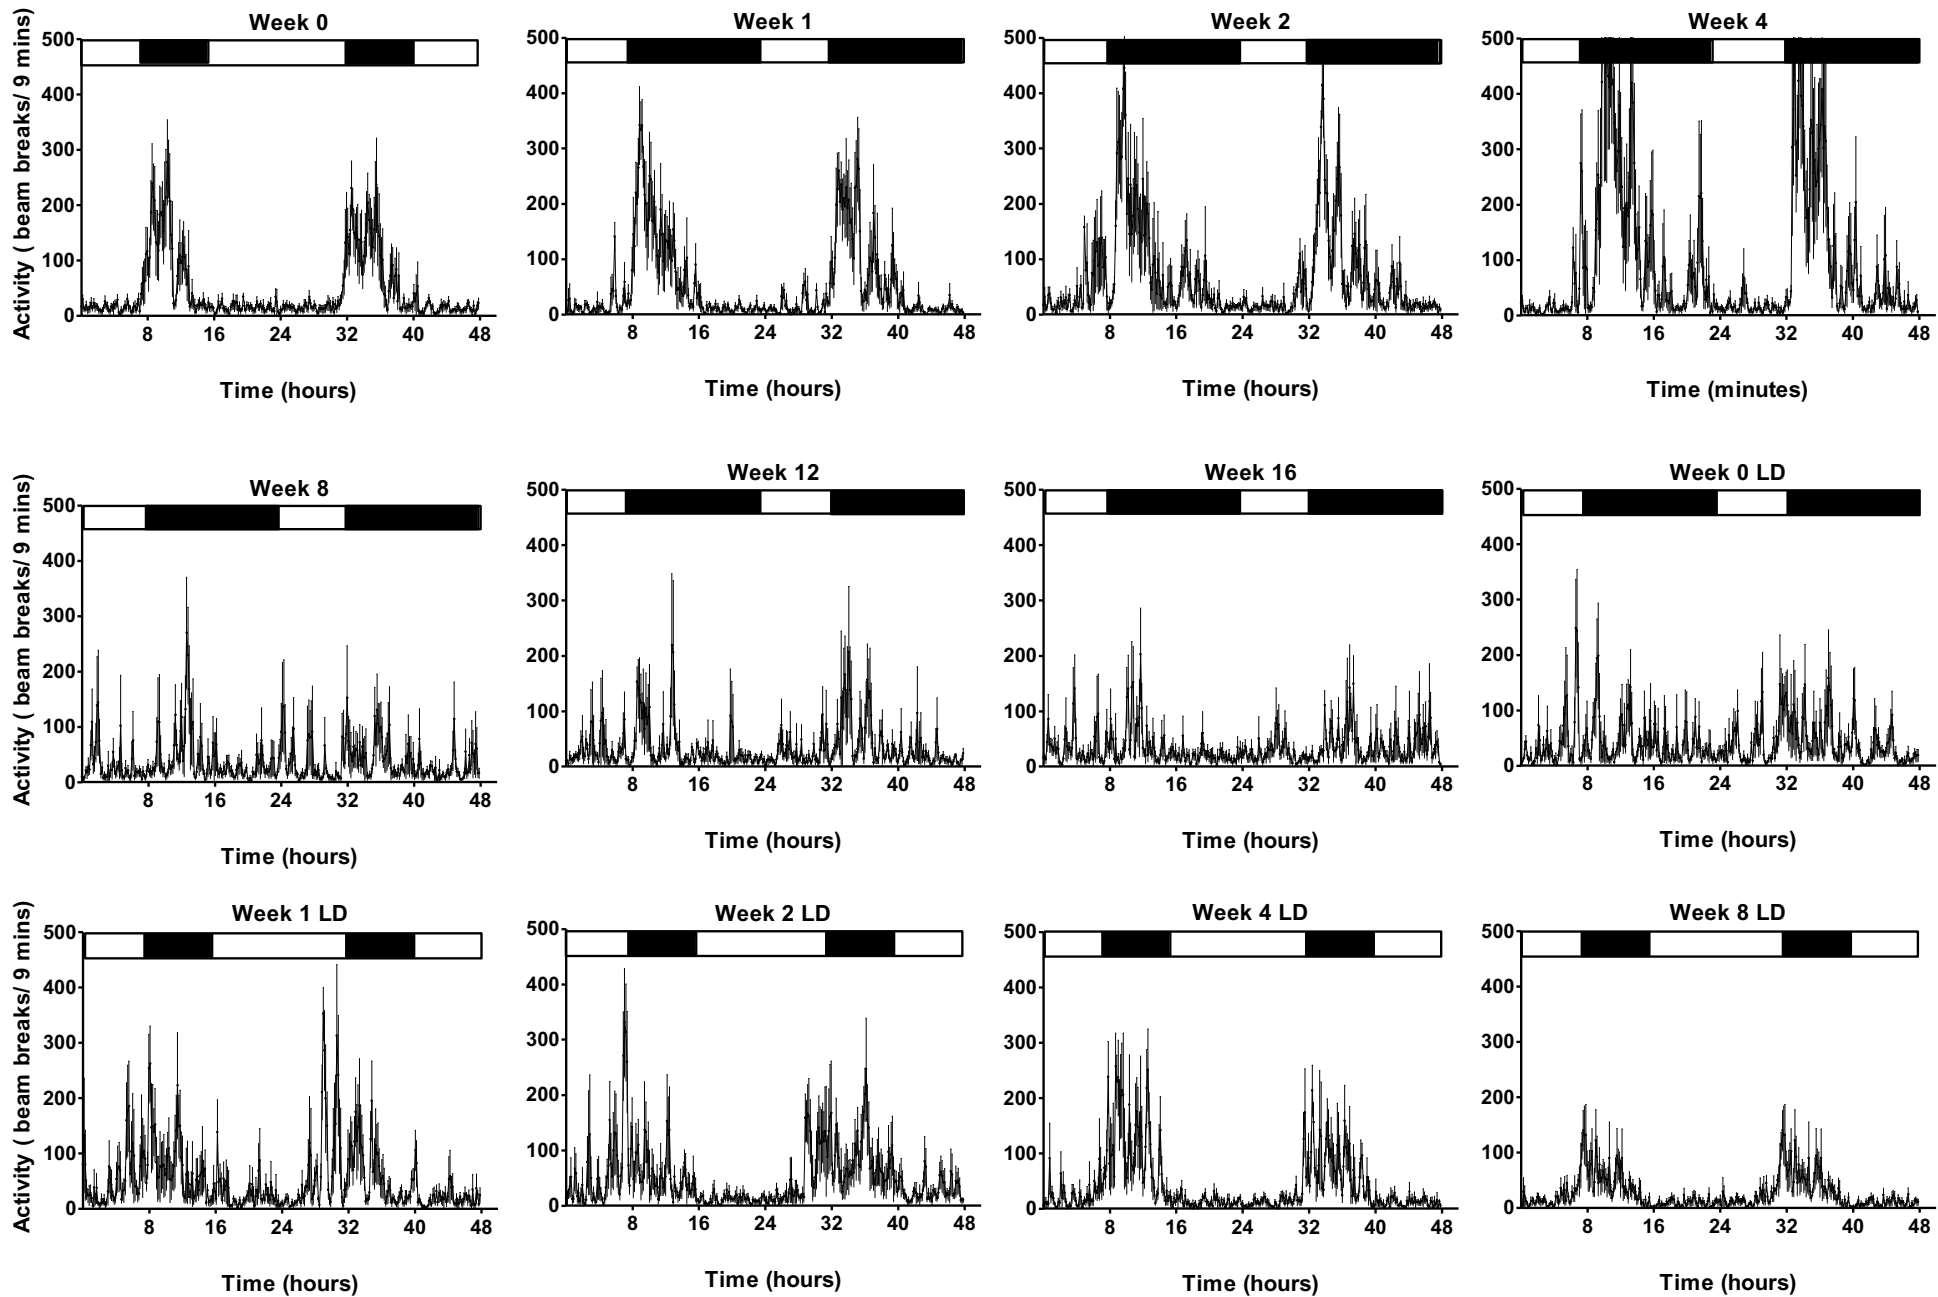

Warner et al Supplementary Figure 1

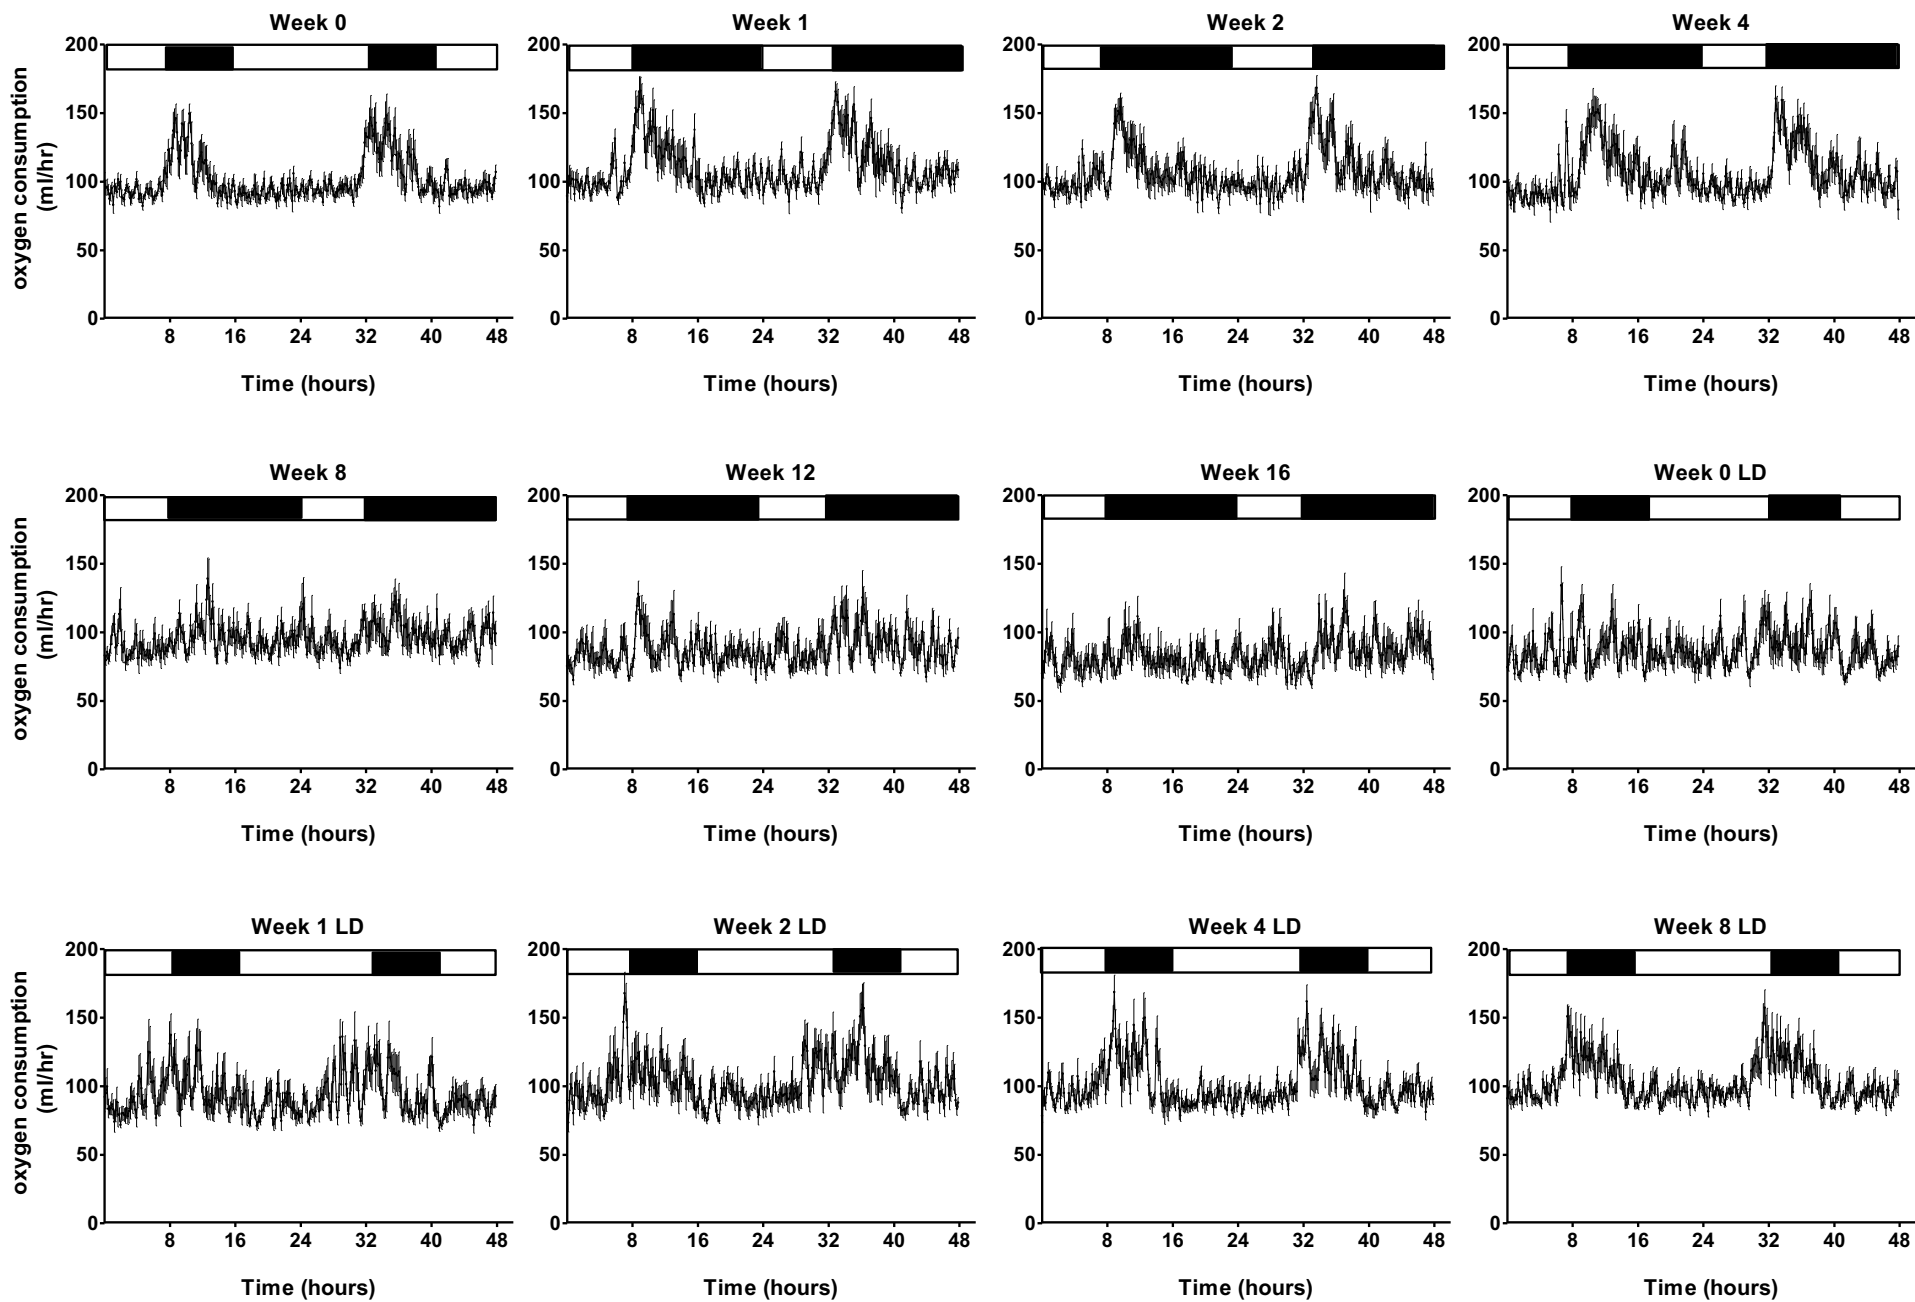

Warner et al Supplementary Figure 2

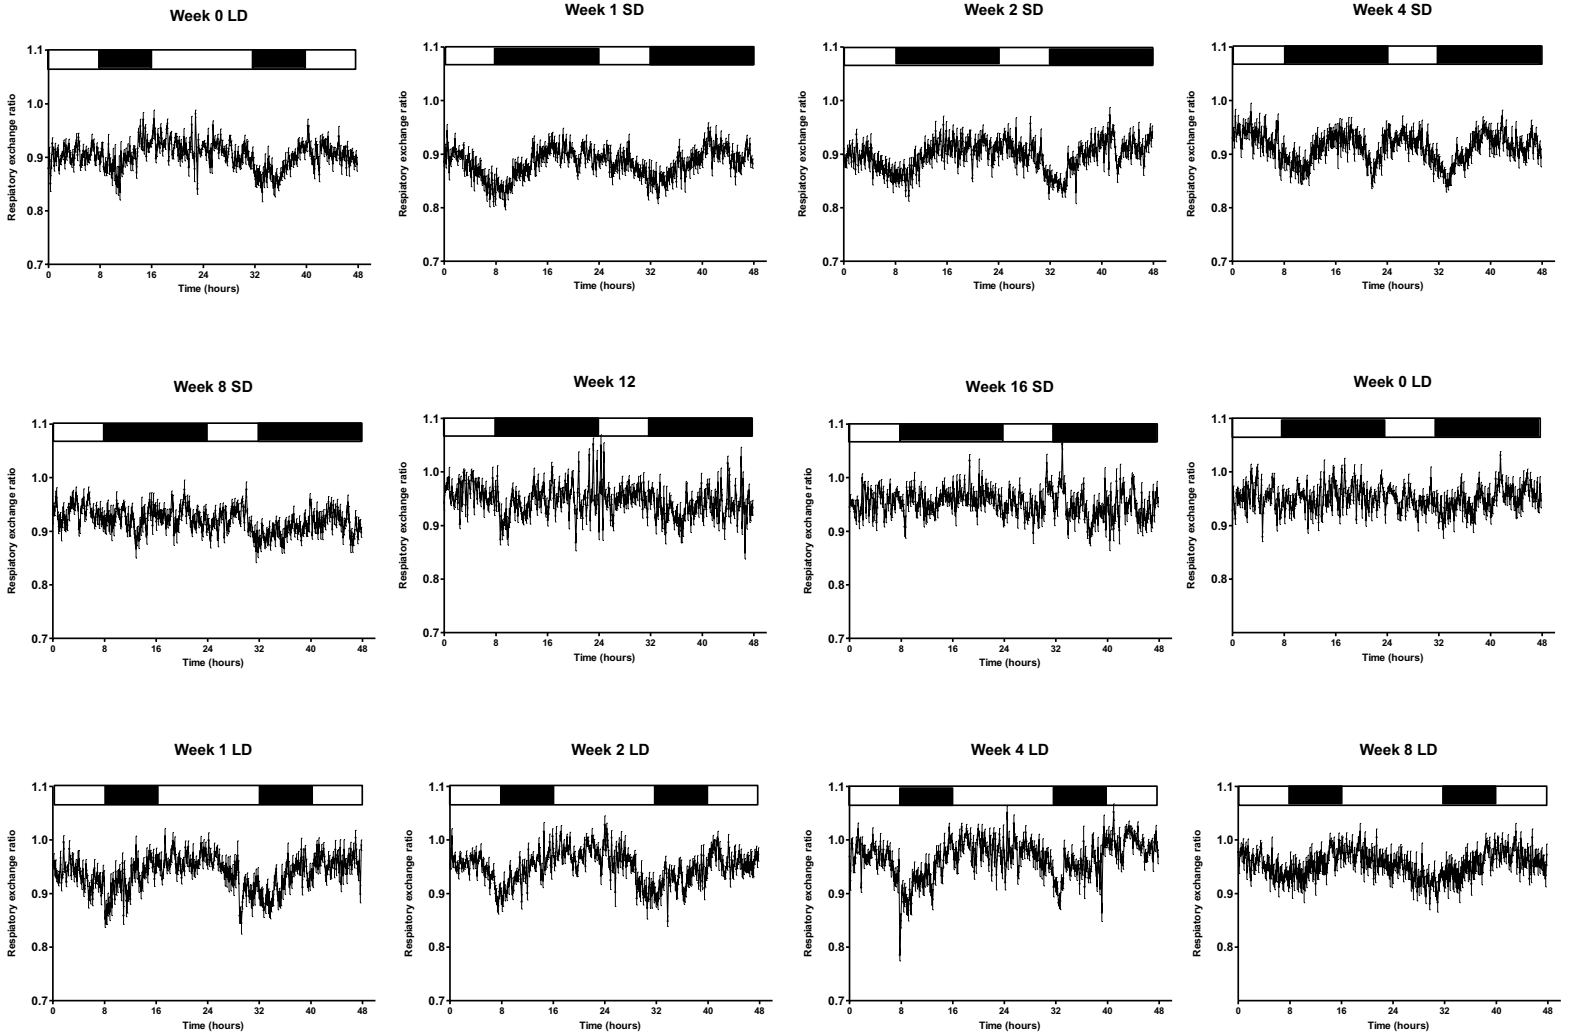

Warner et al Supplementary Figure 3

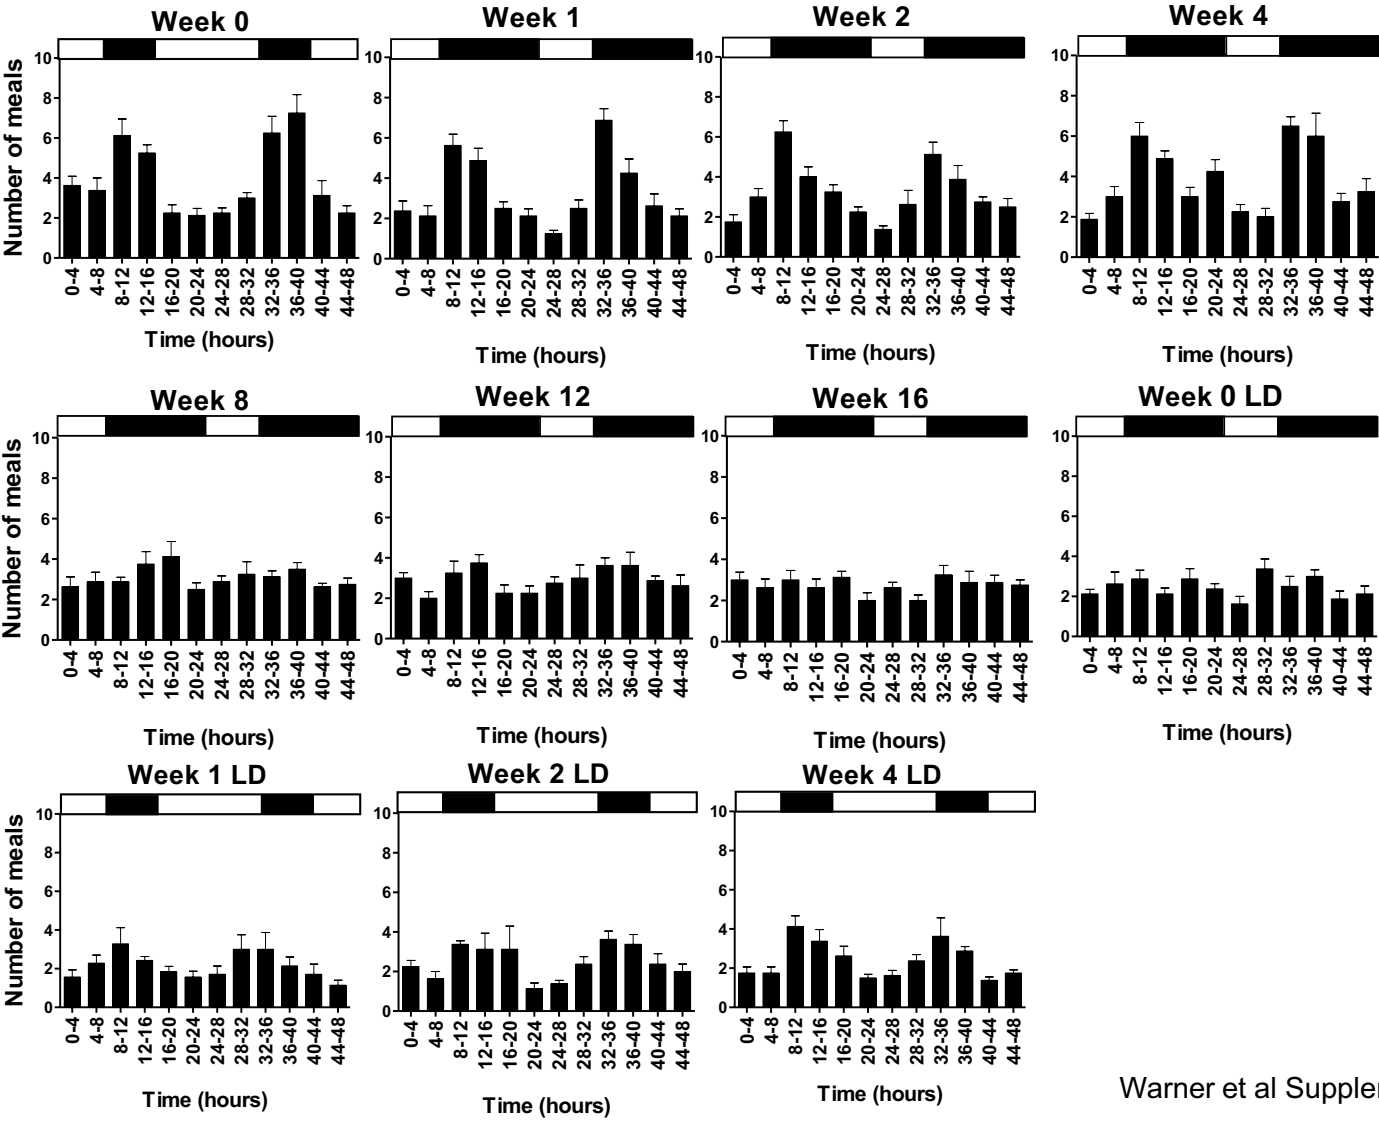

Warner et al Supplementary Figure 4

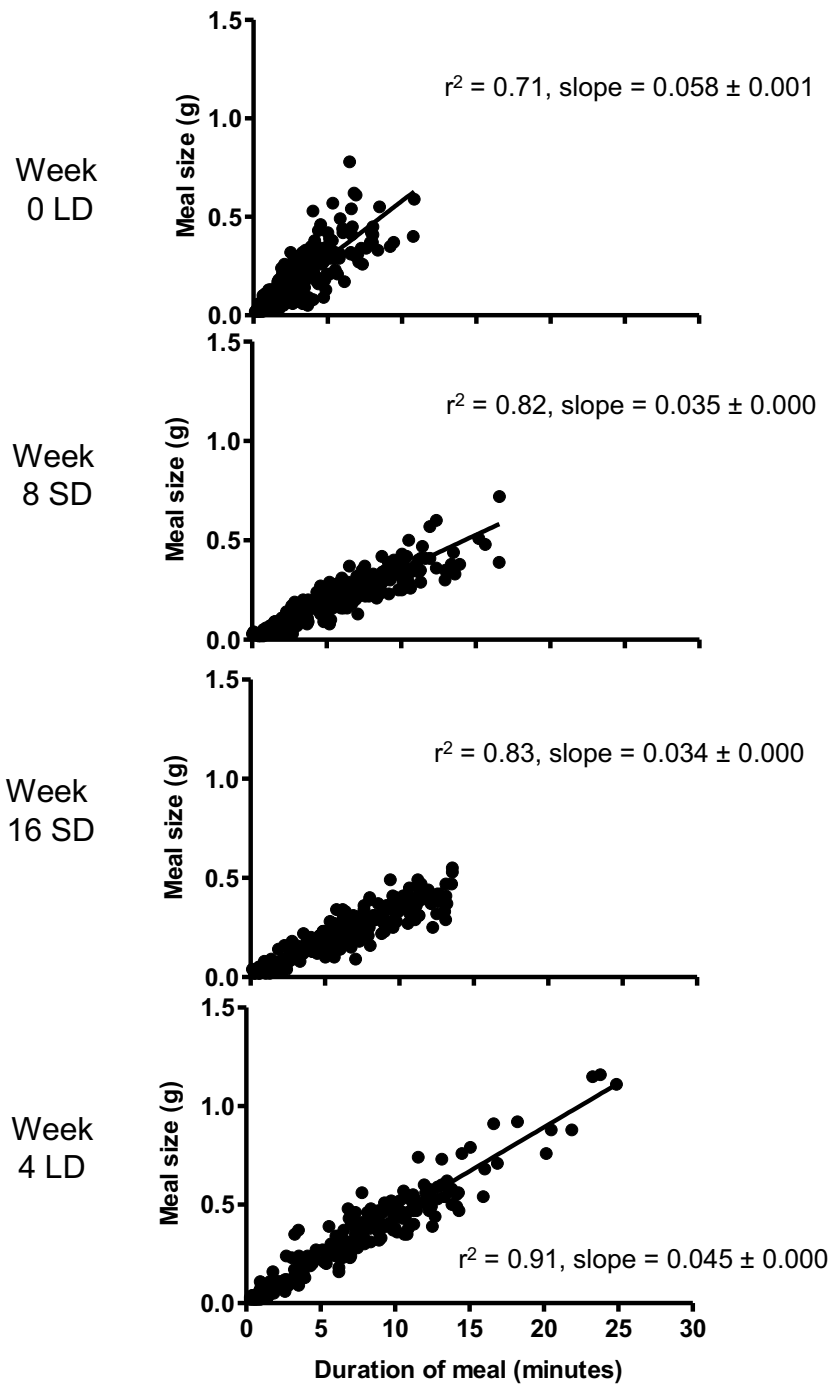

## SUPPLEMENTARY FIGURES

### Supplementary Figure 1

Locomotor activity in adult male hamsters on all CLAMS sampling occasions. Lighting regimes are represented by bars above each graph (solid bar = dark phase, open bars = light phase). Values are the group mean $\pm$ SEM number of successive infrared beam breaks per 9 minute bin, n=8.

### Supplementary Figure 2

Oxygen consumption in adult male hamsters on all CLAMS sampling occasions. Lighting regimes are represented by bars above each graph (solid bar = dark phase, open bars = light phase). Values for each 9 minute bin are group mean $\pm$ SEM, n=8.

### Supplementary Figure 3

Respiratory Exchange Ratio (RER) in adult male hamsters on all CLAMS sampling occasions. Lighting regimes are represented by bars above each graph (solid bar = dark phase, open bars = light phase). Values for each 9 minute bin are group mean $\pm$ SEM, n=8.

### Supplementary Figure 4

Meal frequency in adult male hamsters on all CLAMS sampling occasions. Lighting regimes are represented by bars above each graph (solid bar = dark phase, open bars = light phase). Values are group mean $\pm$ SEM for 4h bins over 48 hours, n=8.

Supplementary Figure 5

Correlations between meal duration and meal size for the four principal sampling occasions for all animals. Slope is defined as the change in Y divided by the change in X.
